# Supplementary material
Source: Springer Nature journal article supplement (https://www.springermedizin.de/resource/supplementary/13014_2005_7_MOESM6_ESM.pdf/9632806)

# Isodoses (Gy)

74.500

69.630

66.149

59.400

56.400

54.000

51.300

40.000

35.000

30.000

26.000

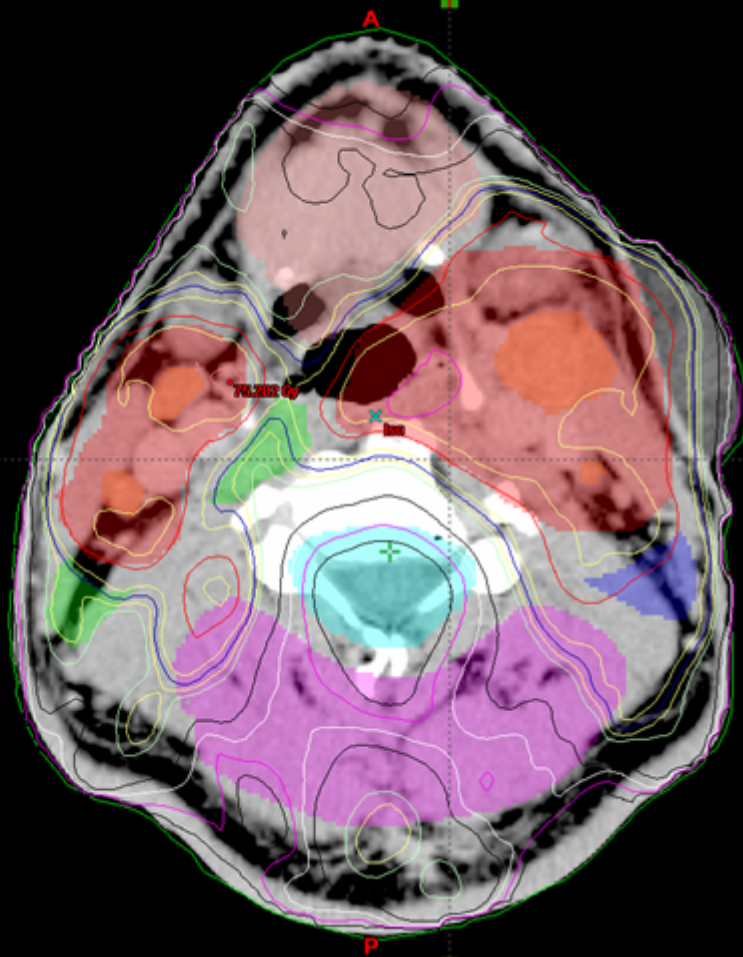

Standard

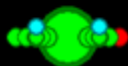

Head First-Supine  
Z: -13.00 cm

Supplement: MOESM6 [file 9632806]
